# Supplementary material for: Fully Automated Quantitative Measurement of Serum Organic Acids via LC-MS/MS for the Diagnosis of Organic Acidemias: Establishment of an Automation System and a Proof-of-Concept Validation
Source: MDPI journal article supplement (doi:10.3390/diagnostics11122195), 2021-11-25
Supplement: s1 [file s1]

Supplemental Figure2

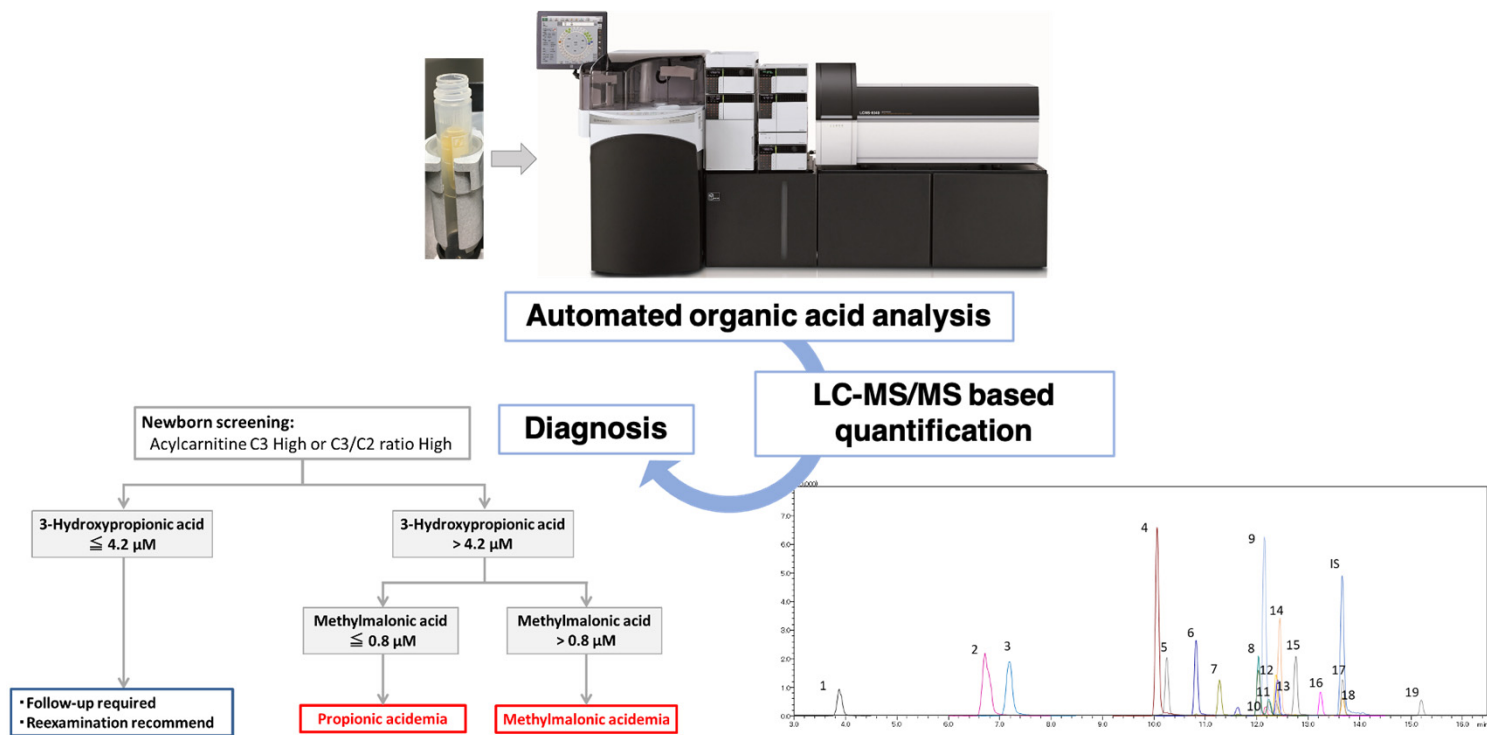

Supplemental Figure 2. Schema of automated diagnosis system for organic acid disorders.
