# Supplementary material for: Fully Automated Quantitative Measurement of Serum Organic Acids via LC-MS/MS for the Diagnosis of Organic Acidemias: Establishment of an Automation System and a Proof-of-Concept Validation
Source: MDPI journal article supplement (doi:10.3390/diagnostics11122195), 2021-11-25
Supplement: s1 [file s1]

## Supplemental Table2

### Results of urine analysis by GC-MS at the time of diagnosis.

| Patient | GC-MS (Urine)  |                                            |
|---------|----------------|--------------------------------------------|
|         | Age at sampled | Results (normal range)                     |
| PA1     | 1 month        | 3-Hydroxypropionic acid: 3.5 (0.0–1.1)     |
|         |                | Phosphoric acid: 145.6 (0.0–43.0)          |
|         |                | Hexanoylglycine: 2.3 (0.0)                 |
|         |                | Methylcitric acid (1): 6.5 (0.0–1.1)       |
|         |                | Methylcitric acid (2): 5.8 (0.0–1.0)       |
| PA2     | 6 months       | Glycolic acid: 5.9 (0.0–2.2)               |
|         |                | 3-Hydroxypropionic acid: 7.6 (0.0–1.1)     |
|         |                | 3-Hydroxybutyric acid: 14.0 (0.0–3.7)      |
|         |                | Benzoic acid: 70.9 (0.0–18.7)              |
|         |                | 3-Hydroxyglutaric acid: 0.9 (0.0)          |
|         |                | Hexanoylglycine: 2.5 (0.0)                 |
|         |                | Vanillic acid: 6.9 (0.0)                   |
|         |                | Citric acid: 1180.9 (31.4–572.0)           |
|         |                | Methylcitric acid (1): 1.3 (0.0–1.1)       |
|         |                | Methylcitric acid (2): 2.2 (0.0–1.0)       |
| PA3     | NA             | NA                                         |
| PA4     | 1 month        | Oxalic acid: 5.8 (0.0)                     |
|         |                | Fumaric acid: 12.1 (0.0–7.3)               |
|         |                | Malic acid: 2.1 (0.0–0.7)                  |
|         |                | 5-Hydroxymethyl-2-furoic acid: 81.8 (0.0)  |
|         |                | 2-Ketoglutaric acid (1): 184.0 (3.0–102.9) |
|         |                | Hexanoylglycine: 8.6 (0.0)                 |
|         |                | Methylcitric acid (1): 2.5 (0.0–1.1)       |
|         |                | Methylcitric acid (2): 2.8 (0.0–1.0)       |
| PA5     | 18 years       | Methylcitric acid                          |
|         |                | 3-Hydroxypropionic acid                    |
|         |                | Propionylglycine                           |
|         |                | Tiglylglycine                              |
| MMA1    | 1 month        | Methylmalonic acid                         |
|         |                | Pyruvic acid                               |
|         |                | Lactic acid                                |
|         |                | Ethylmalonic acid                          |
| MMA2    | 20 days        | 3-Hydroxypropionic acid: 1.8 (0.0–1.1)     |
|         |                | Pyruvic acid: 36.0 (0.0–24.1)              |
|         |                | Methylmalonic acid: 135.7 (0.2–3.6)        |
|         |                | Fumaric acid: 61.0 (0.0–7.3)               |
|         |                | Malic acid: 7.0 (0.0–0.7)                  |
|         |                | Hexanoylglycine: 2.9 (0.0)                 |
|         |                | Vanillic acid: 12.3 (0.0)                  |
|         |                | Methylcitric acid (1): 3.2 (0.0–1.1)       |
|         |                | Methylcitric acid (2): 3.0 (0.0–1.0)       |
| MCG1    | NA             | NA                                         |
