# Supplementary material for: Fully Automated Quantitative Measurement of Serum Organic Acids via LC-MS/MS for the Diagnosis of Organic Acidemias: Establishment of an Automation System and a Proof-of-Concept Validation
Source: MDPI journal article supplement (doi:10.3390/diagnostics11122195), 2021-11-25
Supplement: s1 [file s1]

## Supplemental Table1

### Standards and internal standards

|                    | No | Name                                                  | Vendor                                       | Product No. |
|--------------------|----|-------------------------------------------------------|----------------------------------------------|-------------|
| Standards          | 1  | 3-Hydroxypropionic acid                               | Tokyo Chemical Industry (Tokyo, Japan)       | H0297       |
|                    | 2  | Methylmalonic acid                                    | Sigma-Aldrich (St. Louis, MO, USA)           | M54058      |
|                    | 3  | N-Isovalerylglycine                                   | Sigma-Aldrich (St. Louis, MO, USA)           | 43424       |
|                    | 4  | $\beta$ -Hydroxyisovaleric acid                       | Tokyo Chemical Industry (Tokyo, Japan)       | H0701       |
|                    | 5  | 3-Methylcrotonylglycine                               | Santa Cruz Biotechnology (Dallas, TX, USA)   | sc-209651   |
|                    | 6  | 3-Hydroxy-3-methylglutaric acid                       | Tokyo Chemical Industry (Tokyo, Japan)       | H0436       |
|                    | 7  | 3-Hydroxy-2-methylbutanoic acid                       | Toronto Research Chemicals (Toronto, Canada) | H946485     |
|                    | 8  | Glutaric acid                                         | Tokyo Chemical Industry (Tokyo, Japan)       | G0069       |
|                    | 9  | 3-Methylglutaconic acid                               | Sigma-Aldrich (St. Louis, MO, USA)           | 6689        |
|                    | 10 | 3-Methylglutaric acid                                 | Tokyo Chemical Industry (Tokyo, Japan)       | M0330       |
|                    | 11 | 3-Hydroxyglutaric acid                                | Sigma-Aldrich (St. Louis, MO, USA)           | 4725        |
|                    | 12 | 2-Hydroxyglutaric acid                                | Sigma-Aldrich (St. Louis, MO, USA)           | 90790       |
|                    | 13 | Ethylmalonic acid                                     | Fujifilm Wako Pure Chemicals (Osaka, Japan)  | 320-92121   |
|                    | 14 | Methylsuccinic acid                                   | Tokyo Chemical Industry (Tokyo, Japan)       | M0430       |
|                    | 15 | Adipic acid                                           | Tokyo Chemical Industry (Tokyo, Japan)       | A0161       |
|                    | 16 | N-Hexanoylglycine                                     | Sigma-Aldrich (St. Louis, MO, USA)           | 93544       |
|                    | 17 | Suberic acid                                          | Santa Cruz Biotechnology (Dallas, TX, USA)   | sc-208404   |
|                    | 18 | Sebacic acid                                          | Fujifilm Wako Pure Chemicals (Osaka, Japan)  | 196-00272   |
|                    | 19 | N-Suberoylglycine                                     | Sigma-Aldrich (St. Louis, MO, USA)           | 52888       |
| Internal Standards | 1  | <sup>13</sup> C <sub>3</sub> -3-Hydroxypropionic acid | ALSACHIM (Illkirch, France)                  | C8223       |
|                    | 2  | <sup>13</sup> C <sub>4</sub> -Methylmalonic acid      | ALSACHIM (Illkirch, France)                  | C8325       |
|                    | 3  | 2-Ethylbutyric acid                                   | Sigma-Aldrich (St. Louis, MO, USA)           | 109959      |
