# Supplementary material for: Fully Automated Quantitative Measurement of Serum Organic Acids via LC-MS/MS for the Diagnosis of Organic Acidemias: Establishment of an Automation System and a Proof-of-Concept Validation
Source: MDPI journal article supplement (doi:10.3390/diagnostics11122195), 2021-11-25
Supplement: s1 [file s1]

## Supplemental Figure1

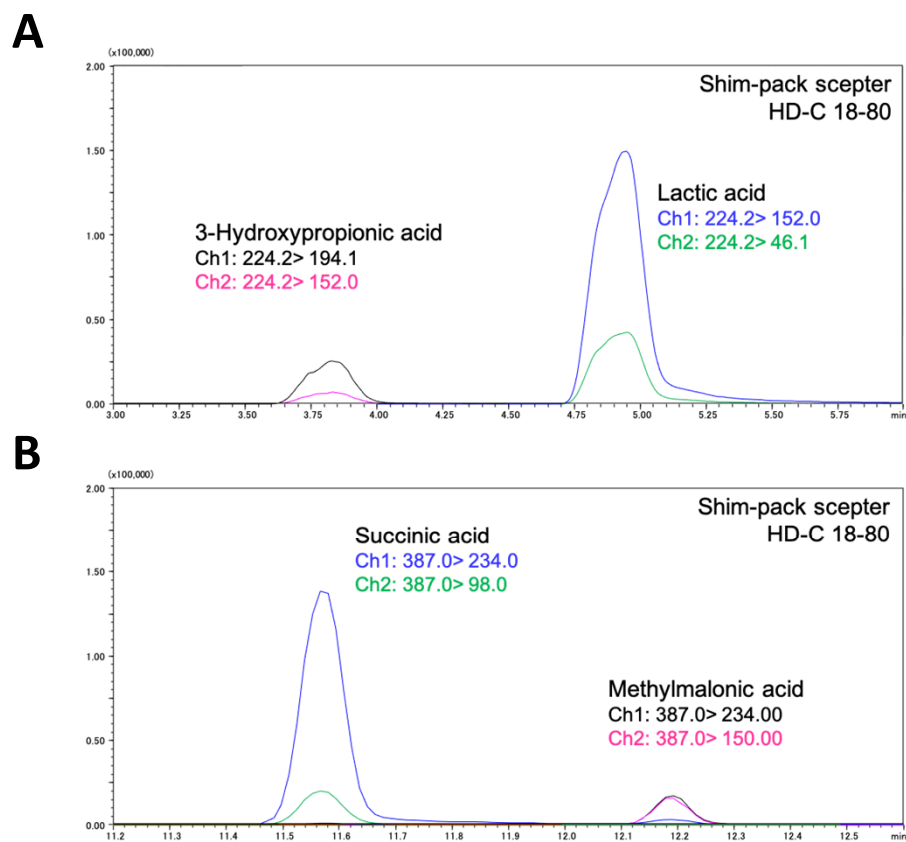

**Supplemental Figure 1. Structural isomers separation.**

(A)  $C_3H_6O_3$ : 3-Hydroxypropionic acid and lactic acid. (B)  $C_4H_6O_4$ : Methylmalonic acid and succinic acid.
